# Supplementary material
Source: publisher figshare collection journal article supplement (https://acs.figshare.com/ndownloader/files/3770542)
Supplement: Supplementary file 1 [file 3770542]

Supporting Information for:

## Prediction of nanoparticle and colloid attachment on unfavorable mineral surfaces using representative discrete heterogeneity

*Jacob Trauscht, Eddy Pazmino, and William P. Johnson<sup>1</sup>*

Department of Geology and Geophysics, University of Utah,

Salt Lake City, Utah 84112, United States

### **Hamaker constants**

A combined Hamaker constant ( $A_{132}$ ) for interaction of CML (phase 1) with muscovite (phase 2) across water (phase 3) was obtained using the approximation below, as subscripted for the three phases (Israelachvili, 2011):

$$A_{132} \approx (\sqrt{A_{11}} - \sqrt{A_{22}})(\sqrt{A_{22}} - \sqrt{A_{33}})$$

where  $A_{ii}$  is the Hamaker constant of polystyrene, muscovite, albite, or water in vacuum. Hamaker constants for polystyrene and water in vacuum were taken from literature and were  $A_{22} = 6.5 \times 10^{-20}$  J and  $A_{33} = 3.7 \times 10^{-20}$  J respectively (Israelachvili, 2011). The Hamaker constant of muscovite in vacuum was averaged from three sources to yield  $A_{11} = 8.9 \times 10^{-20}$  J (Ackler et al., 1996; Bergström, 1997; Israelachvili, 2011). Combining values:

$$A_{132} \approx (\sqrt{8.9 \times 10^{-20}} - \sqrt{6.5 \times 10^{-20}})(\sqrt{6.5 \times 10^{-20}} - \sqrt{3.7 \times 10^{-20}}) = 2.72 \times 10^{-21}$$

A Hamaker constant for albite in vacuum was not available in existing literature; however, one was calculated on the basis of Lifshitz Theory (Israelachvili, 2011):

$$A_{11} \approx \frac{3}{4} kT \left( \frac{\epsilon_1 - \epsilon_3}{\epsilon_1 + \epsilon_3} \right)^2 + \frac{3h\nu_e}{16\sqrt{2}} \frac{(n_1^2 - n_3^2)^2}{(n_1^2 + n_3^2)^{3/2}}$$

where  $k$  is the Boltzmann constant,  $T$  is temperature in kelvins,  $\epsilon_1$  is the dielectric constant of albite,  $\epsilon_3$  is the dielectric constant of the medium ( $\epsilon_3=1$  for a vacuum),  $h$  is Planck's constant,  $\nu_e$  is the mean electronic UV adsorption frequency for albite,  $n_1$  is the refractive index of albite,  $n_3$  is the refractive index of the solution ( $n_3=1$  for vacuum). Since no electronic adsorption frequency ( $\nu_e$ ) was available for albite, it was estimated as  $3 \times 10^{15}$  (1/s) based on values reported for other silicate minerals, which showed a narrow range of values from  $3.2 \times 10^{15}$  (silica) and  $3.0 \times 10^{15}$  (mica) (Israelachvili, 2011). The dielectric constant of albite was averaged from two sources ( $\epsilon_1=6.5 \pm 0.5$ ) (Olhoeft, 1989; Rosenholtz, 1936). The refractive index of albite was averaged ( $n_1=1.535 \pm 0.004$ ) from the three principal crystal

---

<sup>1</sup>Corresponding Author

faces using the higher-end values in those ranges to reflect composition with significant anorthite end-member content in the solid solution (Deer et al., 2001). Inserting values:

$$A_{11} \approx \frac{3}{4} \left( 1.38 \times 10^{-23} \frac{m^2 kg}{s^2 K} \right) (298.15 K) \left( \frac{6.5 - 1}{6.5 + 1} \right)^2 + \frac{3 \left( 6.626 \times 10^{-34} \frac{m^2 kg}{s} \right) (3 \times 10^{15} s^{-1}) (1.535^2 - 1^2)^2}{16\sqrt{2} (1.535^2 + 1^2)^{\frac{3}{2}}} = 8.05 \times 10^{-20} J$$

Inserting values yielded  $A_{132}$  for albite:

$$A_{132} \approx \left( \sqrt{8.05 \times 10^{-20}} - \sqrt{6.5 \times 10^{-20}} \right) \left( \sqrt{6.5 \times 10^{-20}} - \sqrt{3.7 \times 10^{-20}} \right) J = 1.80 \times 10^{-21} J$$

### Calculation of Collector Efficiency ( $\eta$ )

The colloid deposition rate across the area of observation ( $A_{obs}$ ) was used to calculate the collector efficiency ( $\eta$ ) via the following equation:

$$\eta = \frac{\left( \frac{\#attached}{time} \right)_{A_{OBS}}}{\left( \frac{\#injected}{time} \right)_{A_{JET}}} = \frac{\frac{\#attached}{time}}{C_o Q}$$

where  $C_o$  is the injected concentration of colloids and  $Q$  is the flow rate of the fluid that enters the cell (across the area of the jet,  $A_{jet}$ ). The product  $C_o Q$  is equal to the number of particles injected per unit time across the area of the jet ( $A_{jet}$ ). In simulations, colloid injection was performed across a smaller radius ( $R_{lim}$ ) than  $R_{jet}$  for computational efficiency, since beyond this limiting radius (distance from the impinging jet axis) particles had zero chance of reaching the near surface fluid. An appropriate  $R_{lim}$  results in equivalent  $\eta$  despite increases in  $R_{lim}$  up to a limiting size where the number of colloids deposited becomes too small for accurate quantification (e.g., Pazmino 2014a). The radius of the area of observation ( $A_{obs}$ ) in simulations was chosen to circumscribe the same area as the experiment-based  $A_{obs}$  ( $450 \times 336 \mu m^2$ ), and served as the exit radius in the simulations.

### Maxwell Approach Implementation

Hahn and O'Melia (2004) proposed that the fraction of colloids retained in the secondary minimum

( $\alpha_{2min}$ ) is equal to:

$$\alpha_{2min} = 1 - \int_{v_{p(hot)}}^{\infty} f_{Max}(v_p) dv_p$$

Where  $v_p$  is the particle velocity, and  $f_{max(vp)}$  is the Maxwell-Boltzmann distribution cast in terms of velocity (Kubo et al., 1966):

$$f_{Max(v_p)} = 4\pi \left( \frac{m_p}{2\pi kT} \right)^{(3/2)} v_p^2 e^{\left( \frac{-\frac{1}{2}m_p v_p^2}{kT} \right)}$$

where  $m_p$  is the particle mass, and  $k$  the Boltzmann constant and  $T$  the absolute temperature. The integral of  $f_{max(vp)}$  represents the fraction of the population of colloids with kinetic energy greater than the corresponding secondary minimum energy depth ( $\Phi_{2min}$ ), where the integral lower limit is the velocity threshold at which the colloid is “hot” enough to escape the secondary minimum:

$$v_{p(hot)} = \left( \frac{2\Phi_{2min}}{m_p} \right)^{0.5}$$

**Table SI-1: Artificial Groundwater Composition (Taken from Ferris et al.,2004)**

| Electrolyte | Concentration<br>(mM) |
|-------------|-----------------------|
| K2SO4       | 0.00403               |
| MgSO4       | 0.448                 |
| CaCl2       | 1.75                  |
| NaNO3       | 0.0044                |
| NaHCO3      | 1.10                  |
| KHCO3       | 0.0623                |

**Table SI-2: Zeta potential values used in simulations where CML=carboxylate modified polystyrene latex. Values determined from measurement on a dynamic light scattering instrument.**

| Material | Particle Size (um) | Electrolyte       | Concentration (mM) | pH  | ζ-potential average (mV) | ζ-potential std. dev. (mV) |
|----------|--------------------|-------------------|--------------------|-----|--------------------------|----------------------------|
| CML      | 0.25               | NaCl              | 6                  | 6.7 | -35.7                    | 4.6                        |
| CML      | 1.1                | NaCl              | 6                  | 6.7 | -78.5                    | 2.0                        |
| CML      | 2                  | NaCl              | 6                  | 6.7 | -79.2                    | 0.6                        |
| CML      | 0.25               | NaCl              | 20                 | 6.7 | -26                      | 5.4                        |
| CML      | 1.1                | NaCl              | 20                 | 6.7 | -48.9                    | 5.1                        |
| CML      | 2                  | NaCl              | 20                 | 6.7 | -61.5                    | 1.0                        |
| CML      | 0.25               | NaCl              | 6                  | 8   | -40.8                    | 2.9                        |
| CML      | 1.1                | NaCl              | 6                  | 8   | -91                      | 2.1                        |
| CML      | 2                  | NaCl              | 6                  | 8   | -80.5                    | 1.0                        |
| CML      | 0.25               | NaCl              | 20                 | 8   | -26.5                    | 1.1                        |
| CML      | 1.1                | NaCl              | 20                 | 8   | -62.2                    | 1.3                        |
| CML      | 2                  | NaCl              | 20                 | 8   | -66.5                    | 1.0                        |
| CML      | 0.25               | CaSO <sub>4</sub> | 1.5                | 6.7 | -34.9                    | 3.3                        |
| CML      | 1.1                | CaSO <sub>4</sub> | 1.5                | 6.7 | -48.3                    | 1.4                        |
| CML      | 2                  | CaSO <sub>4</sub> | 1.5                | 6.7 | -43.7                    | 0.5                        |
| CML      | 0.25               | CaSO <sub>4</sub> | 6                  | 6.7 | -16.5                    | 2.0                        |
| CML      | 1.1                | CaSO <sub>4</sub> | 6                  | 6.7 | -32.9                    | 0.9                        |
| CML      | 2                  | CaSO <sub>4</sub> | 6                  | 6.7 | -29.3                    | 0.7                        |
| CML      | 0.25               | AGW               | 1.8                | 6.7 | -32.3                    | 2.1                        |
| CML      | 1.1                | AGW               | 1.8                | 6.7 | -44.9                    | 1.5                        |
| CML      | 2                  | AGW               | 1.8                | 6.7 | -41.7                    | 1.3                        |

**Table SI-3. Exemplary Simulation Parameters.**

**Flow and Geometry Parameters**

| Particle Radius | Average Jet velocity | Jet Radius    | Injection Radius | Exit Radius    | Chamber Height |
|-----------------|----------------------|---------------|------------------|----------------|----------------|
| $a_p$ (m)       | $v_{jet}$ (m/s)      | $R_{jet}$ (m) | $R_{lim}$ (m)    | $R_{exit}$ (m) | $z_{max}$ (m)  |
| 1.00E-06        | 1.70E-03             | 5.00E-04      | 4.00E-06         | 2.19E-04       | 1.22E-03       |

**Physical Parameters of Materials**

| Particle Density              | Water Density                 | Viscosity      | Temperature | Exit Radius    | Chamber Height |
|-------------------------------|-------------------------------|----------------|-------------|----------------|----------------|
| $\rho_p$ (kg/m <sup>3</sup> ) | $\rho_w$ (kg/m <sup>3</sup> ) | $\mu$ (kg/m/s) | $T$ (m)     | $R_{exit}$ (m) | $z_{max}$ (m)  |
| 1.06E+03                      | 9.98E+02                      | 9.98E-04       | 2.98E+02    | 2.19E-04       | 1.22E-03       |

**Colloid Elastic Parameters**

| Hysteresis Loss Factor       | Young's Modulus | Diffusion Force Scaling Parameter |
|------------------------------|-----------------|-----------------------------------|
| $\beta$ (kg/m <sup>3</sup> ) | $K_{int}$ (m)   | Multiplier of Diffusion Vector    |
| 1.06E+03                     | 9.98E+02        | $D_{fact}$ (-)                    |
|                              |                 | 1.35E+00                          |

**van der Waals and Steric Force Parameters**

| Hamaker Constant | vdW Characteristic Wavelength | Maximum Steric Repulsion | Steric Decay Length | Buffer Distance from Steric Minimum |
|------------------|-------------------------------|--------------------------|---------------------|-------------------------------------|
| $A_{132}$ (J)    | $\lambda$ (m)                 | $W_0$ (J/m)              | $\lambda_0$ (m)     | $d_{sep}$ (m)                       |
| 3.84E-21         | 1.00E-07                      | 2.10E-01                 | 6.35E-11            | 5.00E-10                            |

**Water Chemistry and Surface Charge Parameters**

| Ionic Strenght             | Electrolyte Valence | Collector Zeta Potential | Particle Zeta Potential |
|----------------------------|---------------------|--------------------------|-------------------------|
| $IS$ (mol/m <sup>3</sup> ) | $z_i$ (-)           | $\zeta_c$ (V)            | $\zeta_p$ (V)           |
| 2.00E+01                   | 1                   | -5.30E-02                | -4.10E-02               |

**Heterodomain Parameters**

| Number of Heterodomains per tile | Tile Size      | Heterodomain Zeta Potential | Fluid Flow Field Parameters | Flow Field Coefficient 1 | Flow Field Coefficient 2 | Chamber Aspect Ratio Coefficeint |
|----------------------------------|----------------|-----------------------------|-----------------------------|--------------------------|--------------------------|----------------------------------|
| $N_{Het}$ (#)                    | $T_{size}$ (m) | $\zeta_{het}$ (V)           |                             | $\alpha_1$ (-)           | $\alpha_2$ (-)           | $\chi$ (-)                       |
| 3.84E-21                         | 1.50E-05       | 5.30E-02                    |                             | -1.00E-01                | 6.60E-02                 | 9.00E-01                         |

**Simulation and Time Parameters**

| Number of Particles | Simulation Time | Multiplier of $d_t$ for bulk trajectory | Multiplier of $d_t$ for contact trajectory | Ouput Settings | Number of Lines of Trajectory Array | Write to Array Interval |
|---------------------|-----------------|-----------------------------------------|--------------------------------------------|----------------|-------------------------------------|-------------------------|
| $N_{part}$ (#)      | $T_{time}$ (s)  | <b>MULT</b> (-)                         | <b>MULT2</b> (-)                           |                | $N_{OUT}$ (#)                       | <b>PI1</b> (#)          |
| 10000               | 1.00E+04        | 1.00E+02                                | 1.00E+00                                   |                | 5000                                | 500                     |

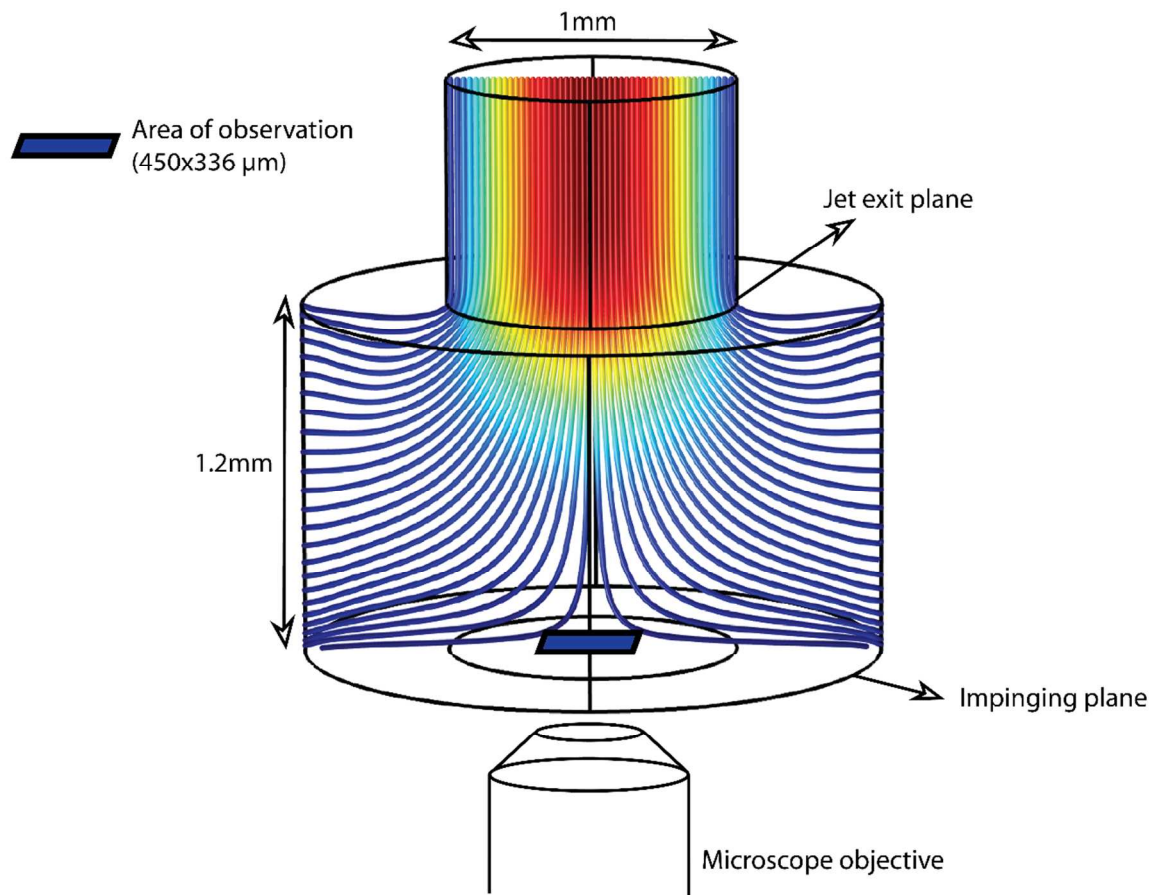

Figure SI-1: Schematic of the impinging jet flow chamber. Fluid flow field is represented by color coded flow lines (red high velocity, blue low velocity). The jet is 1mm in diameter and the impinging plane is located 1.2 mm below the jet exit. Images of attached colloids are acquired via an inverted microscope across an area of observation of 450x336  $\mu\text{m}$  on the impinging plane aligned with the center of the jet.

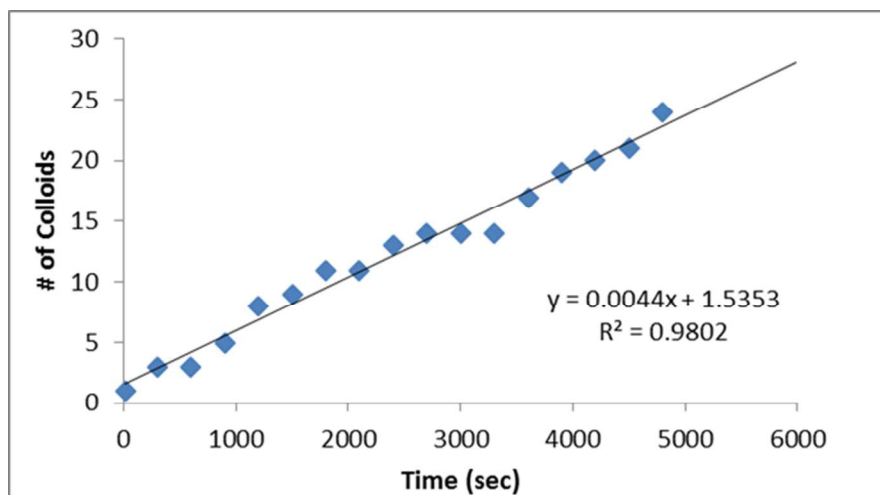

Figure SI-2. Number of colloids on surface as a function of time, experimental data from an impinging jet experiment on muscovite,  $5.94 \times 10^{-3}$  m/s, 6 mM, pH 6.7.

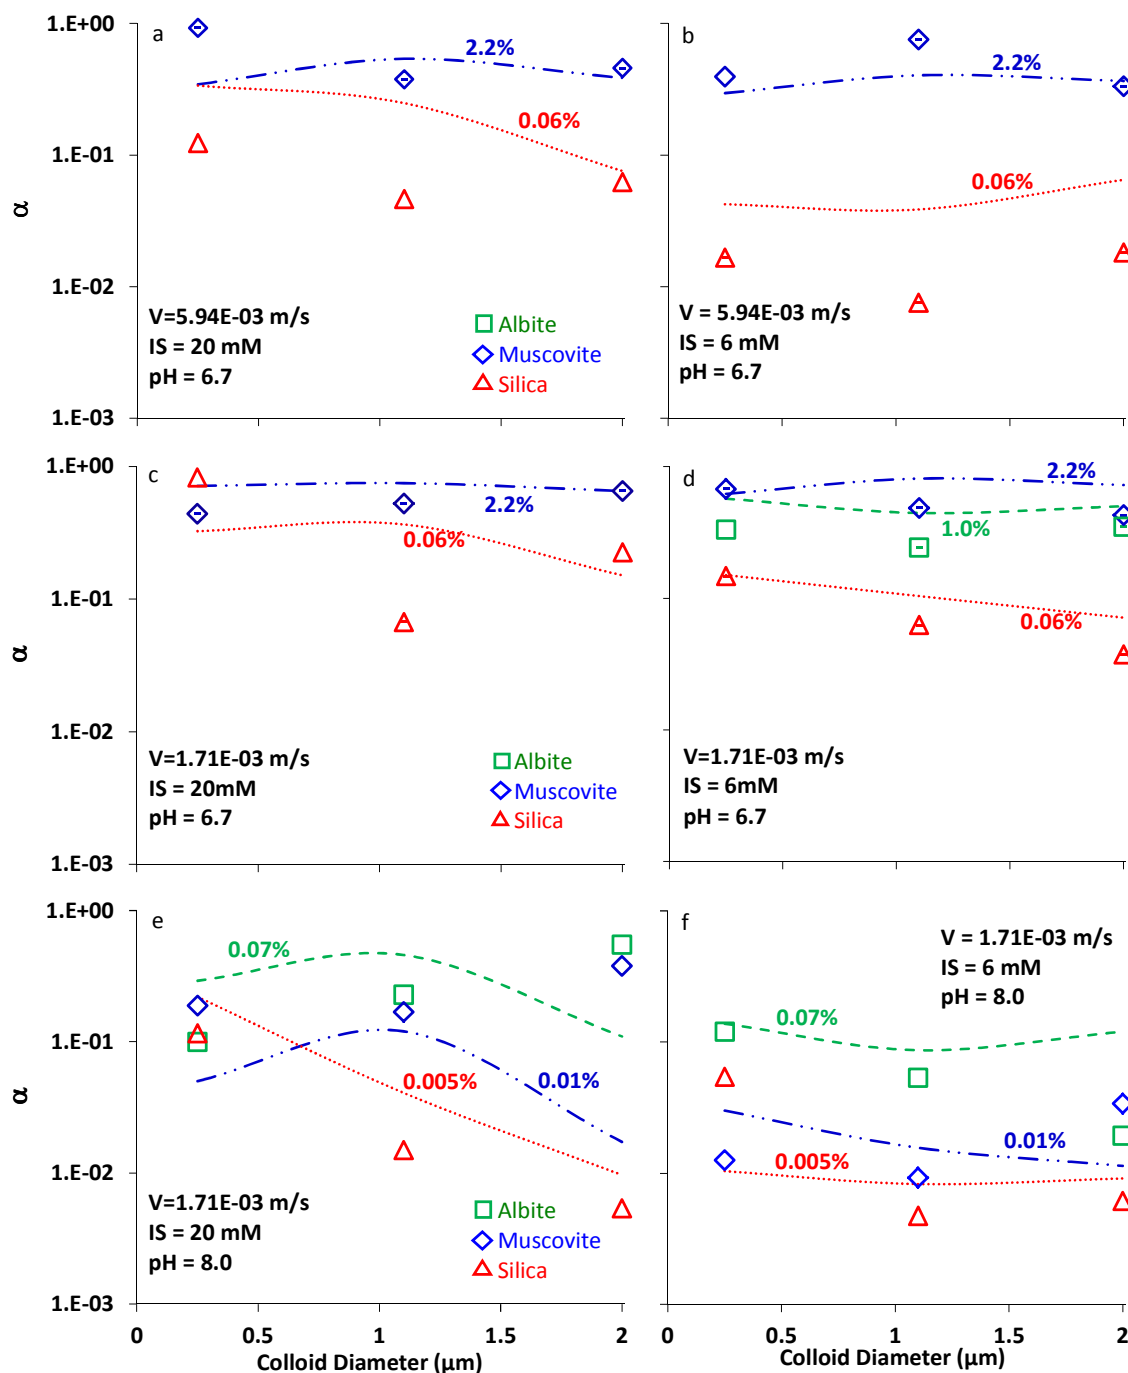

Figure SI-3. Experimentally-observed collision efficiencies ( $\alpha$ ) as a function of colloid size for soda-lime glass (red triangles), muscovite (blue diamonds) and albite (green squares) at multiple ionic strengths (6mM, 20mM), pH values (6.7 and 8.0) and fluid velocities ( $1.71E-03$ ,  $5.94E-03$  m/s). Colored textured lines represent unfavorable condition mechanistic particle trajectory simulations (blue dash-dot=muscovite, red dot=glass, green dash=albite). A Pareto size distribution of heterodomains was approximated using a 1:4 ratio of 120 nm to 60 nm (radius) heterodomains was utilized to represent soda-lime glass collectors and muscovite and albite collectors. Surface coverage by heterodomains is reported adjacent to simulation line.



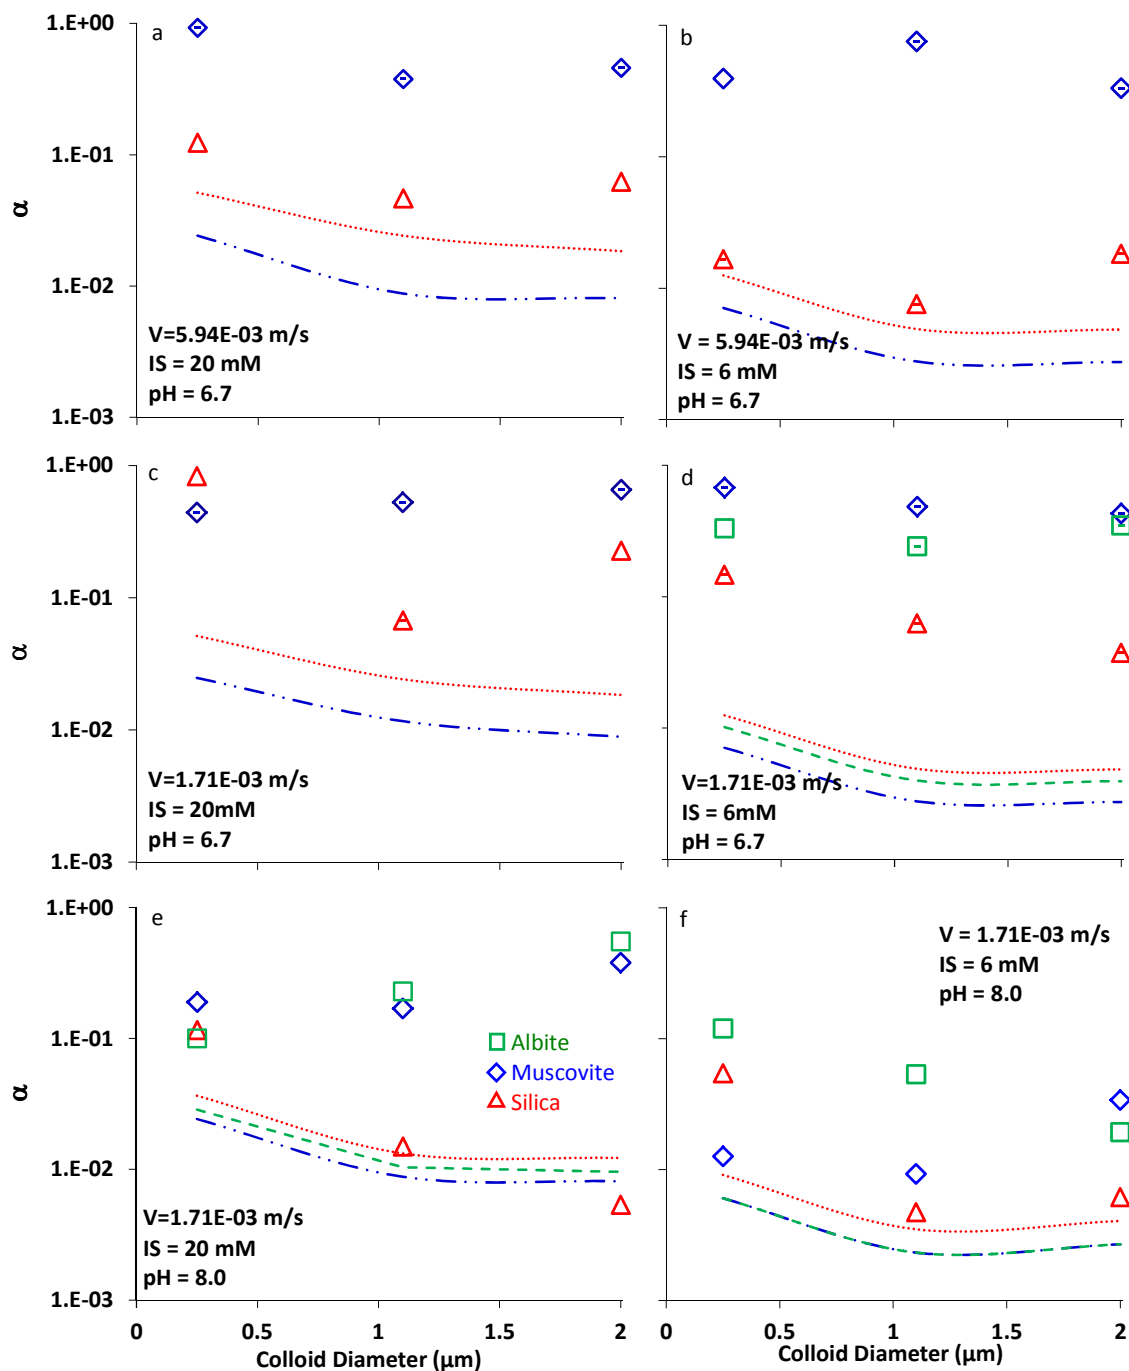

Figure SI-4: Experimentally-observed collision efficiencies ( $\alpha$ ) as a function of colloid size for soda-lime glass (red triangles), muscovite (blue diamonds) and albite (green squares) at multiple ionic strengths (6mM, 20mM), pH values (6.7 and 8.0) and fluid velocities ( $1.71E-03$ ,  $5.94E-03 \text{ m/s}$ ). Colored textured lines represent unfavorable condition predictions (blue dash-dot=muscovite, red dot=glass, green dash=albite). Unfavorable condition predictions were performed using the correlation equation developed by Elimelech (1992).

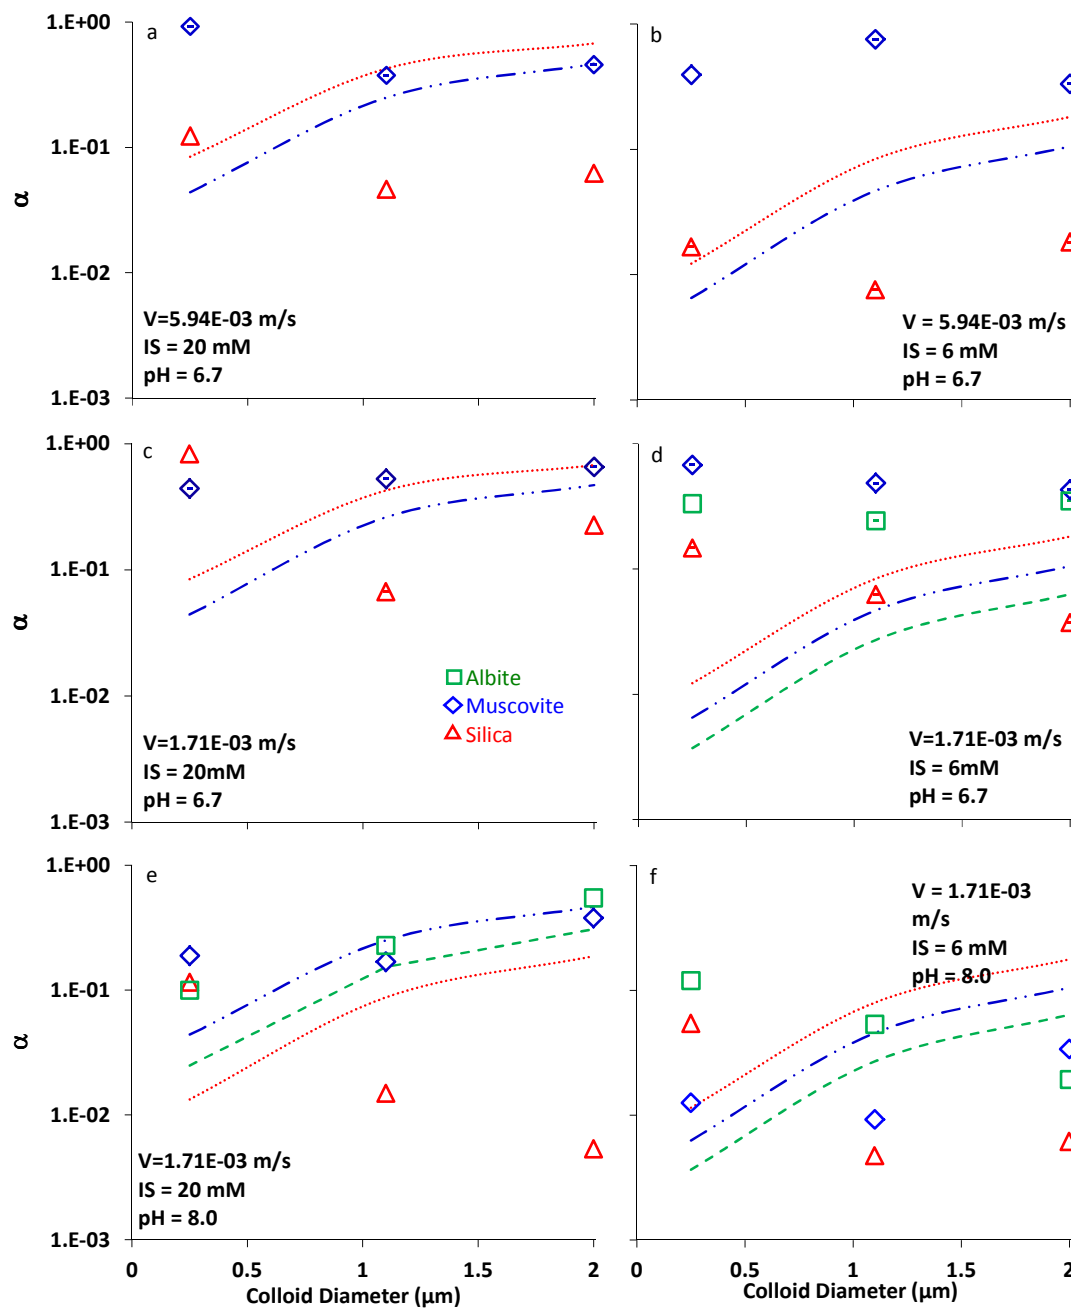

Figure SI-5: Experimentally-observed collision efficiencies ( $\alpha$ ) as a function of colloid size for soda-lime glass (red triangles), muscovite (blue diamonds) and albite (green squares) at multiple ionic strengths (6mM, 20mM), pH values (6.7 and 8.0) and fluid velocities ( $1.71E-03$ ,  $5.94E-03$  m/s). Colored textured lines represent unfavorable condition predictions (blue dash-dot=muscovite, red dot=glass, green dash=albite). Unfavorable condition predictions were performed using the Maxwell approach provided by Hahn and O'Melia (2004).

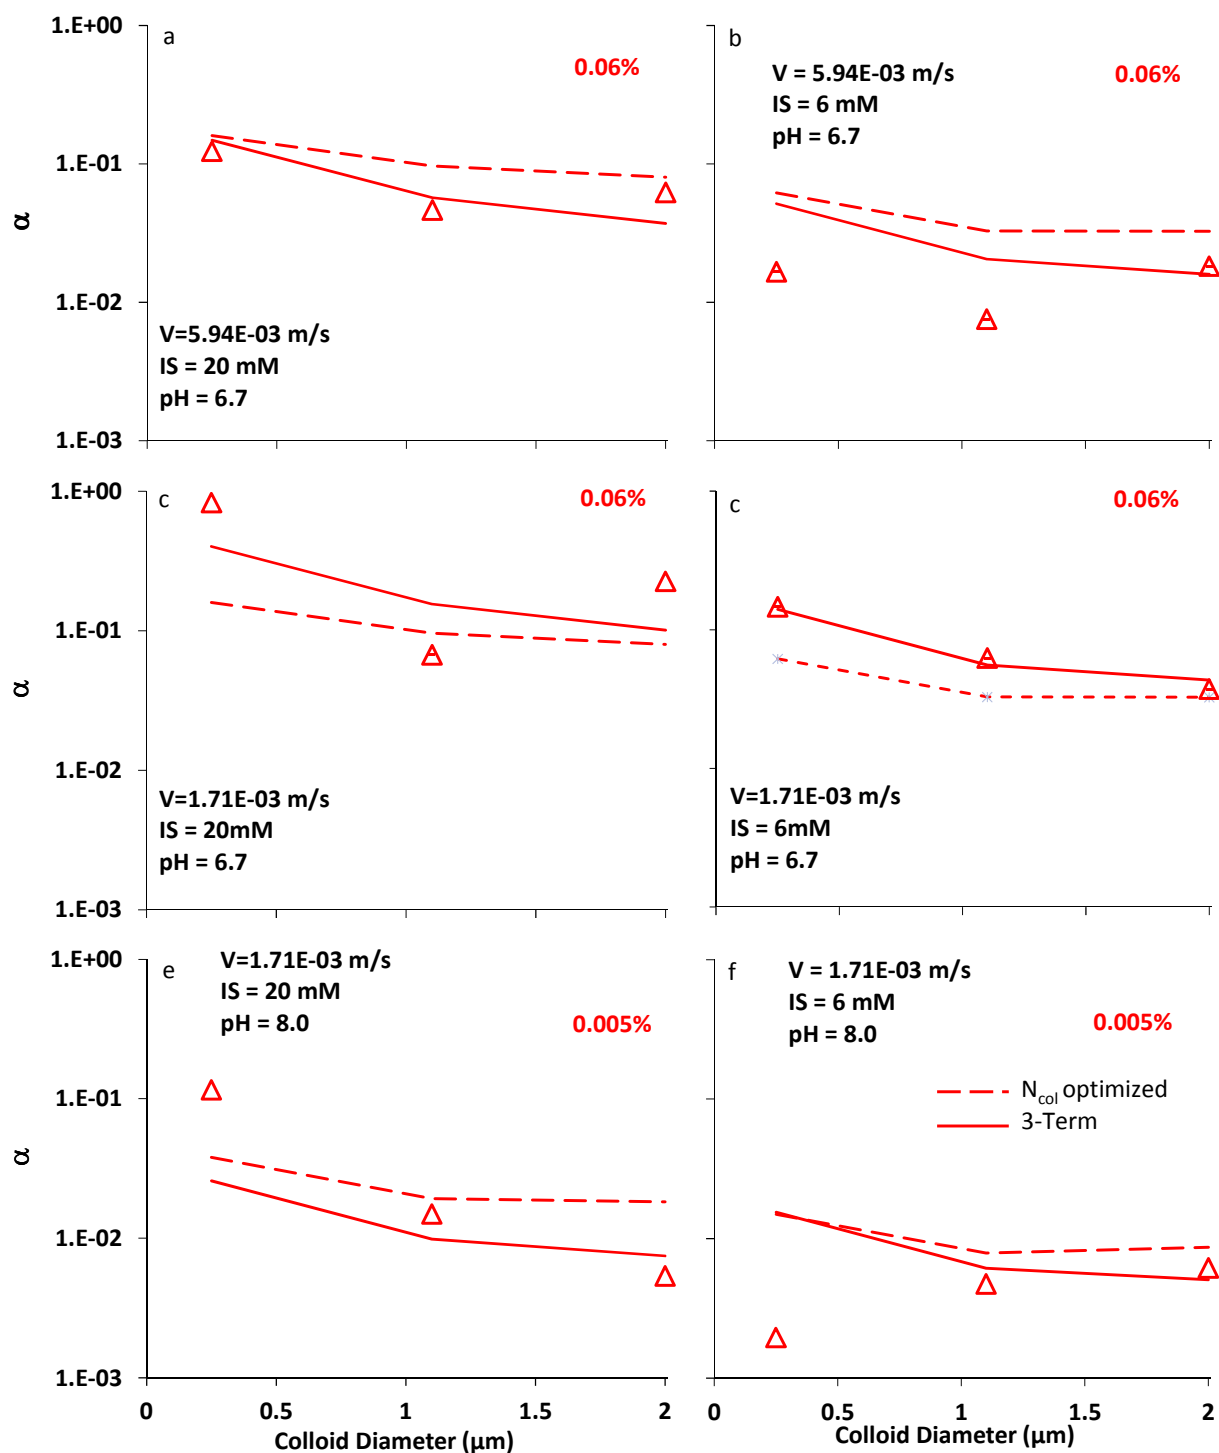

Figure SI-6: Experimentally-observed collision efficiencies ( $\alpha$ ) as a function of colloid size for soda-lime glass (symbols), at multiple ionic strengths (6mM, 20mM), pH values (6.7 and 8.0) and fluid velocities ( $1.71E-03$ ,  $5.94E-03 \text{ m/s}$ ). Dashed lines correspond to optimized  $N_{\text{col}}$  correlation equations fit. Solid lines correspond to optimized 3-term correlation equation fit.

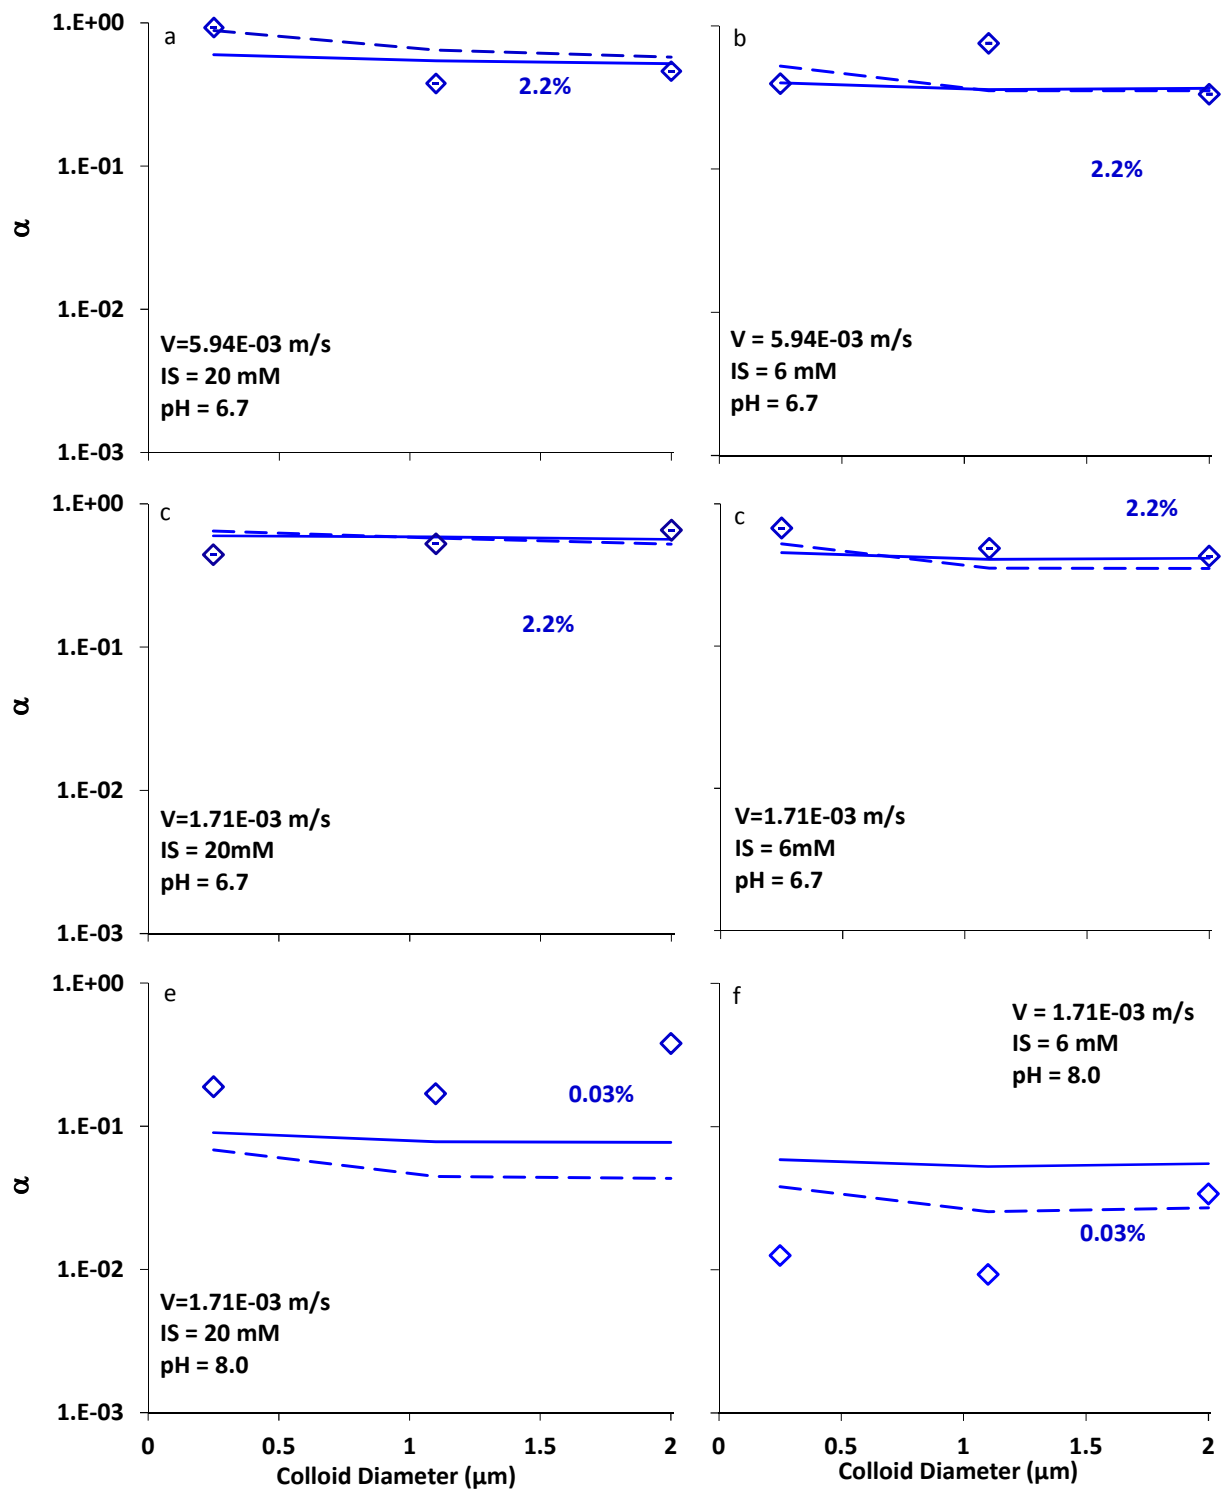

Figures SI-7: Experimentally-observed collision efficiencies ( $\alpha$ ) as a function of colloid size for muscovite (symbols), at multiple ionic strengths (6mM, 20mM), pH values (6.7 and 8.0) and fluid velocities ( $1.71E-03$ ,  $5.94E-03$  m/s). Dashed lines correspond to optimized Ncol correlation equations fit. Solid lines correspond to optimized 3-term correlation equation fit.

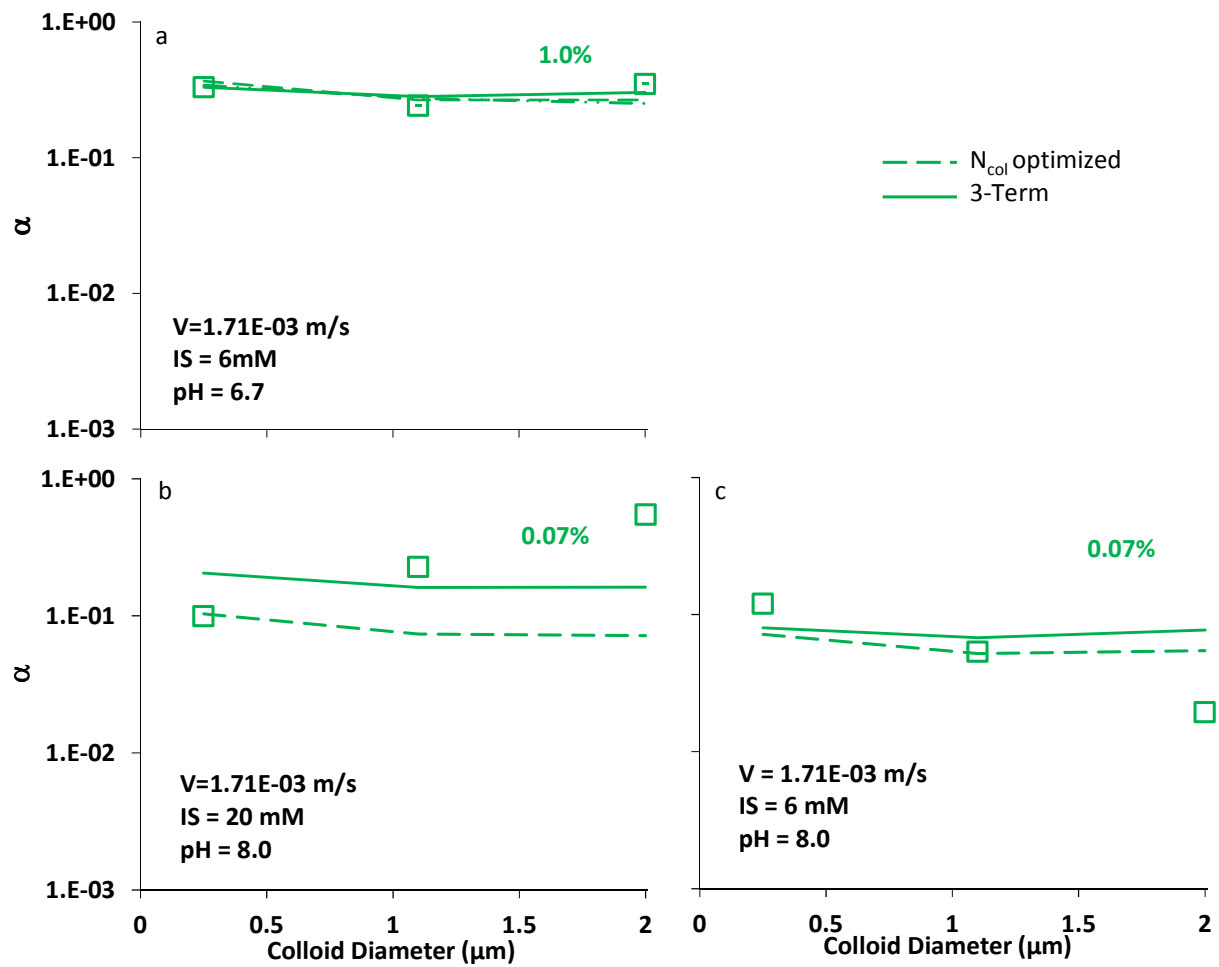

Figures SI-8: Experimentally-observed collision efficiencies ( $\alpha$ ) as a function of colloid size for muscovite (symbols), at multiple ionic strengths (6mM, 20mM), pH values (6.7 and 8.0) and 1.71E-03 m/s fluid velocity. Dashed lines correspond to optimized  $N_{\text{col}}$  correlation equations fit. Solid lines correspond to optimized 3-term correlation equation fit.

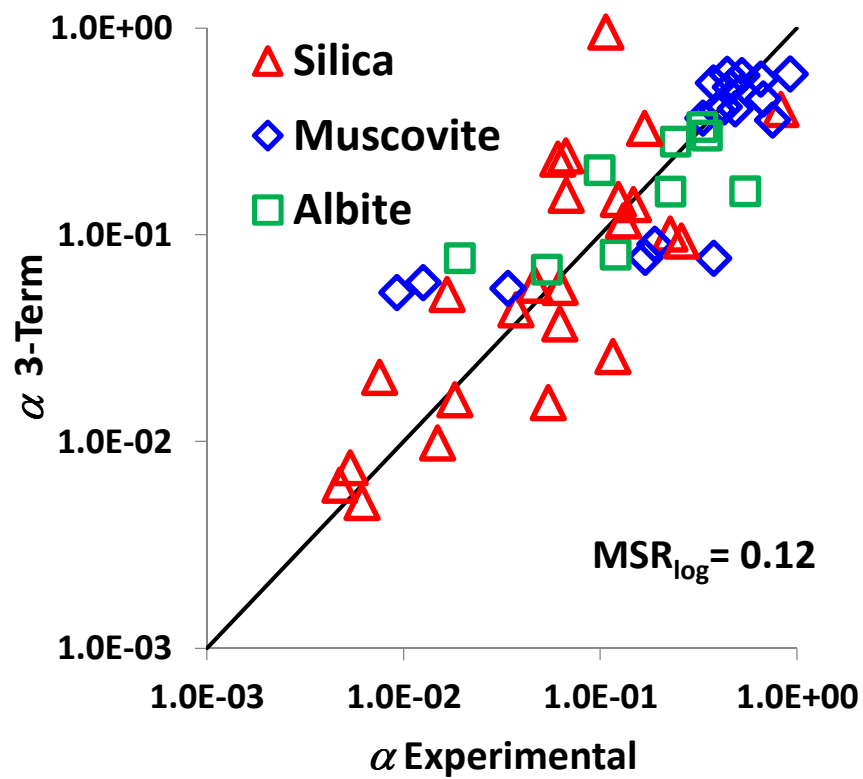

Figure SI-9: Predicted  $\alpha$  values versus experiments (n=51) utilizing the 3-term correlation equation.

## References Cited

- Ackler, H. D.; French, R. H.; Chiang, Y.-M., Comparisons of Hamaker Constants for Ceramic Systems with Intervening Vacuum or Water: From Force Laws and Physical Properties. *Journal of Colloid and Interface Science* **1996**, 179 (2), 460-469.
- Bergström, L., Hamaker constants of inorganic materials. *Advances in Colloid and Interface Science* **1997**, 70 (0), 125-169.
- Deer, W. A.; Howie, R. A.; Zussman, J., *Rock-forming Minerals: Feldspars, Volume 4A*. Geological Society: 2001.
- Hahn, M. W.; O'Melia, C. R., Deposition and Reentrainment of Brownian Particles in Porous Media under Unfavorable Chemical Conditions: Some Concepts and Applications. *Environmental Science and Technology* 2004, 38 (1), 210-220.
- Israelachvili, J., Intermolecular and Surface Forces 3rd Edition. *Elsevier* **2011**. pp 361-370.
- Kubo, R., The fluctuation-dissipation theorem. *Reports on Progress in Physics* 1966, 29, (1), 255.
- Olhoeft, G. R., Electrical Properties of Rocks. *Physical Properties of Rocks and Minerals* **1989**.
- Pazmino, E.; Trauscht, J.; Dame, B.; Johnson, W. P., Power Law Size-Distributed Heterogeneity Explains Colloid Retention on Soda Lime Glass in the Presence of Energy Barriers. *Langmuir* **2014a**, 30 (19), 5412-5421.
- Rosenholtz, J. L. R. S., Dudley T., The Dielectric Constant of Mineral Powders *Rensselaer Polytechnic Institute Engineering and Science Series* **1936**, 52.
